# Supplementary material for: Kinetics and Mechanisms of Saccharomyces boulardii Release from Optimized Whey Protein–Agavin–Alginate Beads under Simulated Gastrointestinal Conditions
Source: MDPI journal article supplement (doi:10.3390/bioengineering9090460), 2022-09-09
Supplement: s1 [file s1]

## 1. Supplementary material

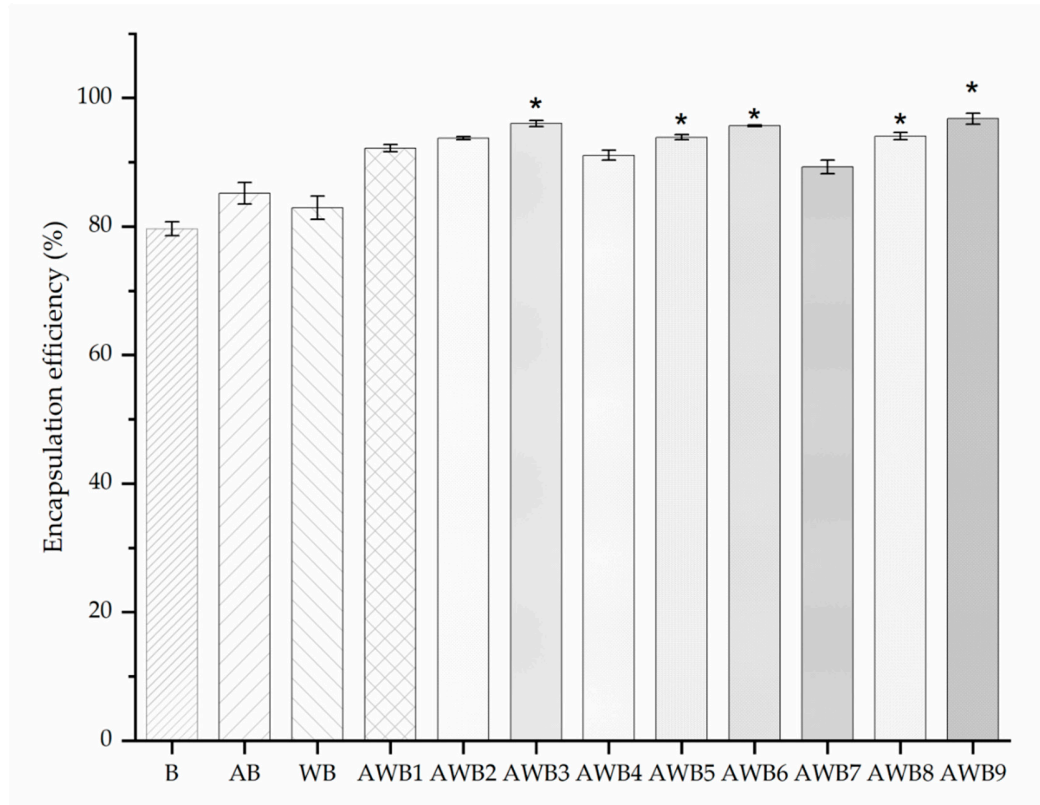

**Figure S1.** Encapsulation efficiency of *S. boulardii* for beads using agavins and whey protein as wall materials at different concentrations.

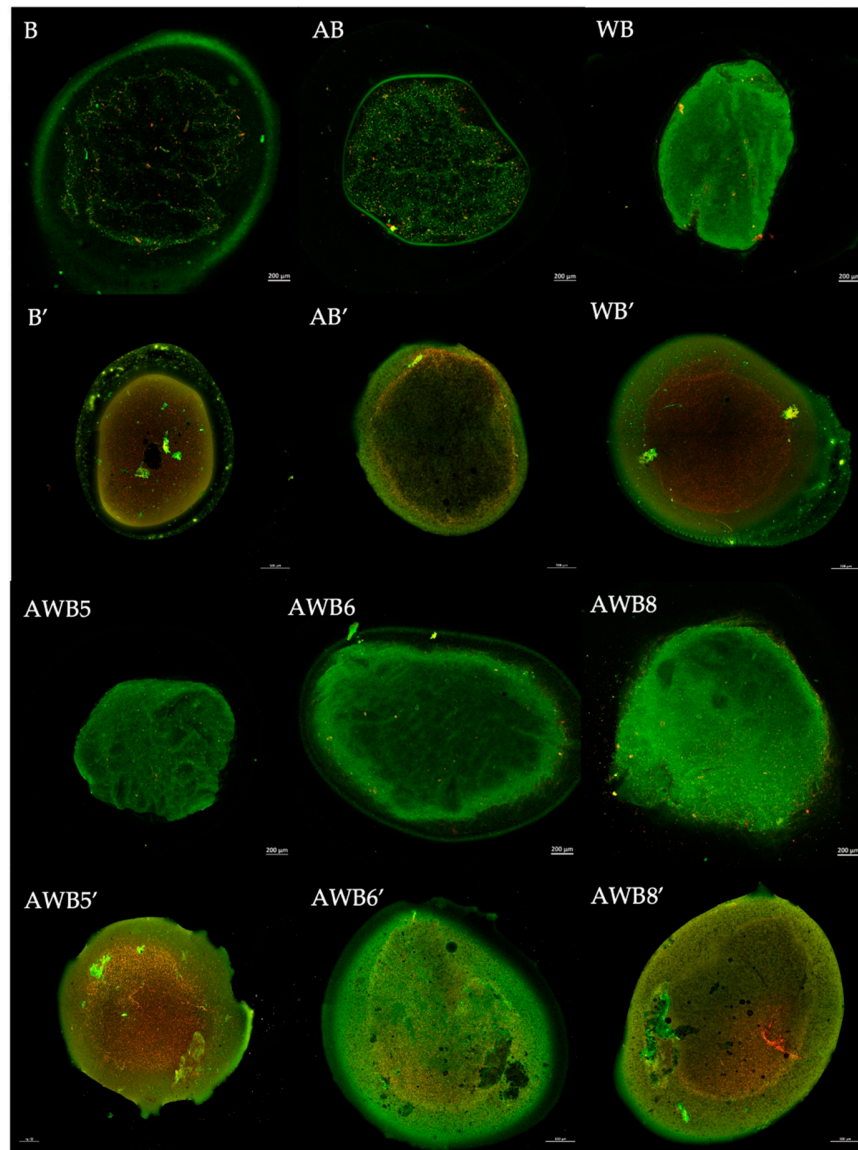

**Figure S2.** Confocal micrographs of optimized beads of *S. boulardii* under *in vitro* gastrointestinal digestion conditions for viability staining. Nomenclature without apostrophe indicates micrographs taken at minute 0 (salivary phase). Nomenclature with apostrophe indicates micrographs taken at minute 250 (intestinal phase).

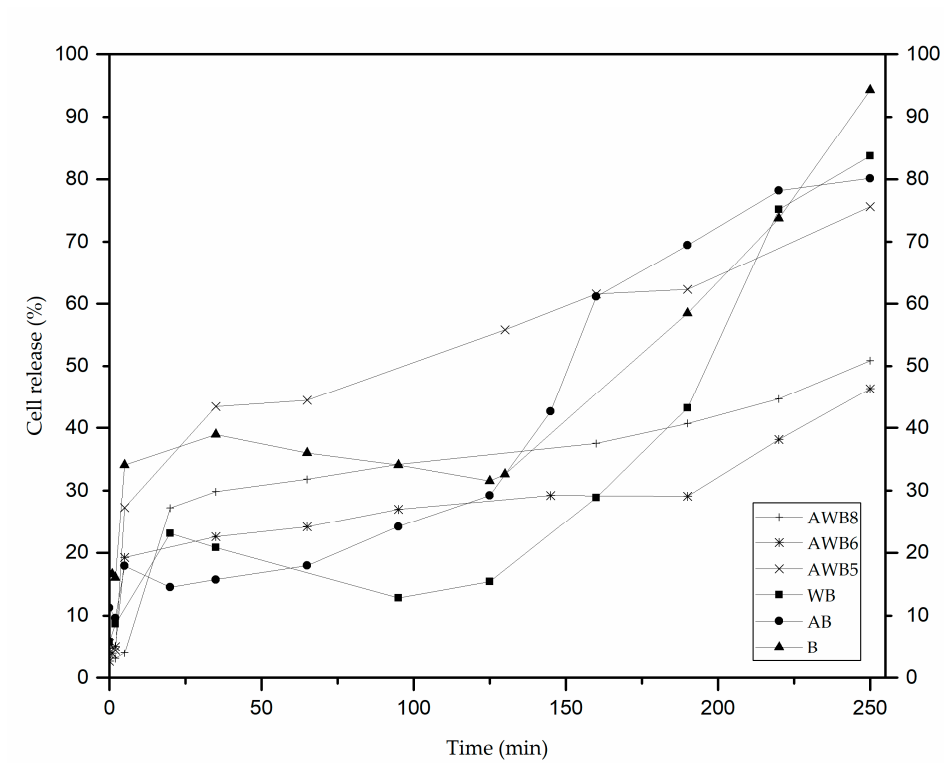

**Figure S3.** Percentage release of *S. boulardii* encapsulates during gastrointestinal digestion *in vitro*.

**Table S1.** Comparison of shape and dimensional parameters of *S. boulardii* encapsulates.

|                         |      | Type of Bead         |                        |                        |                            |                        |                            |                            |                        |
|-------------------------|------|----------------------|------------------------|------------------------|----------------------------|------------------------|----------------------------|----------------------------|------------------------|
|                         |      | B                    | AB                     | WB                     | AWB3                       | AWB5                   | AWB6                       | AWB8                       | AWB9                   |
| Area (mm <sup>2</sup> ) | Mean | 4.849 <sub>d</sub>   | 5.540 <sub>a</sub>     | 5.920 <sub>c</sub>     | 5.405 <sub>a,b</sub>       | 5.893 <sub>c</sub>     | 5.431 <sub>a</sub>         | 5.805 <sub>c</sub>         | 5.430 <sub>a</sub>     |
|                         | SE   | ±0.04                | ±0.05                  | ±0.07                  | ±0.05                      | ±0.05                  | ±0.06                      | ±0.06                      | ±0.02                  |
| Perimeter (mm)          | Mean | 9.439 <sub>c,j</sub> | 9.396 <sub>c,h</sub>   | 9.516 <sub>c,i</sub>   | 9.168 <sub>a,c,e,f,g</sub> | 9.441 <sub>c,d,e</sub> | 9.082 <sub>b,e,h,i,j</sub> | 9.152 <sub>a,c,e,f,g</sub> | 8.931 <sub>b,g</sub>   |
|                         | SE   | ±0.14                | ±0.06                  | ±0.09                  | ±0.07                      | ±0.06                  | ±0.07                      | ±0.06                      | ±0.03                  |
| Circularity             | Mean | 0.692 <sub>h</sub>   | 0.789 <sub>b,e,g</sub> | 0.824 <sub>a,f,g</sub> | 0.808 <sub>a,e</sub>       | 0.831 <sub>a,c,e</sub> | 0.828 <sub>a,c,e</sub>     | 0.871 <sub>c</sub>         | 0.856 <sub>c,d,f</sub> |
|                         | SE   | ±0.01                | ±0.00                  | ±0.01                  | ±0.01                      | ±0.00                  | ±0.01                      | ±0.00                      | ±0.00                  |
| Solidity                | Mean | 0.983 <sub>a</sub>   | 0.990 <sub>b</sub>     | 0.989 <sub>b</sub>     | 0.989 <sub>b</sub>         | 0.990 <sub>b</sub>     | 0.990 <sub>b</sub>         | 0.993 <sub>b</sub>         | 0.991 <sub>b</sub>     |
|                         | SE   | ±0.00                | ±0.00                  | ±0.00                  | ±0.00                      | ±0.00                  | ±0.00                      | ±0.00                      | ±0.00                  |

SE: Standard error of the mean. Note: values from the same row and subtable that do not share the same subscript are significantly different in the multiple comparison test Tukey,  $p < 0.05$ .

**Table S2.** Comparison of internal structure parameters of *S. boulardii* encapsulates.

|                         |      | Type of Bead            |                       |                       |                       |                         |                         |
|-------------------------|------|-------------------------|-----------------------|-----------------------|-----------------------|-------------------------|-------------------------|
|                         |      | B                       | AB                    | WB                    | AWB5                  | AWB6                    | AWB8                    |
| Second angular momentum | Mean | 0.964 <sub>b,c</sub>    | 0.944 <sub>a</sub>    | 0.963 <sub>b</sub>    | 0.945 <sub>a</sub>    | 0.950 <sub>a,b</sub>    | 0.956 <sub>a,b</sub>    |
|                         | SE   | ±0.00                   | ±0.00                 | ±0.00                 | ±0.00                 | ±0.01                   | ±0.00                   |
| Contrast                | Mean | 1008.881 <sub>b,c</sub> | 1584.216 <sub>a</sub> | 1051.047 <sub>b</sub> | 1541.675 <sub>a</sub> | 1424.428 <sub>a,b</sub> | 1239.540 <sub>a,b</sub> |
|                         | SE   | ±53.69                  | ±55.19                | ±20.13                | ±194.70               | ±132.27                 | ±49.68                  |
| Correlation             | Mean | 0.000370 <sub>b,c</sub> | 0.000232 <sub>a</sub> | 0.000354 <sub>b</sub> | 0.000253 <sub>a</sub> | 0.000264 <sub>a</sub>   | 0.000301 <sub>a,b</sub> |
|                         | SE   | ±0.00                   | ±0.00                 | ±0.00                 | ±0.00                 | ±0.00                   | ±0.00                   |
| Entropy                 | Mean | 0.109 <sub>b,c</sub>    | 0.158 <sub>a</sub>    | 0.113 <sub>b</sub>    | 0.155 <sub>a</sub>    | 0.144 <sub>a,b</sub>    | 0.130 <sub>a,b</sub>    |
|                         | SE   | ±0.00                   | ±0.01                 | ±0.00                 | ±0.02                 | ±0.01                   | ±0.01                   |
| Fractal dimension       | Mean | 1.561 <sub>c</sub>      | 1.638 <sub>a</sub>    | 1.574 <sub>b,c</sub>  | 1.627 <sub>a</sub>    | 1.615 <sub>a,b</sub>    | 1.602 <sub>a,b,c</sub>  |
|                         | SE   | ±0.01                   | ±0.01                 | ±0.00                 | ±0.02                 | ±0.01                   | ±0.01                   |
| Lacunarity              | Mean | 0.039 <sub>a,b</sub>    | 0.028 <sub>b</sub>    | 0.031 <sub>a,b</sub>  | 0.043 <sub>a</sub>    | 0.034 <sub>a,b</sub>    | 0.032 <sub>a,b</sub>    |
|                         | SE   | ±0.00                   | ±0.00                 | ±0.00                 | ±0.01                 | ±0.00                   | ±0.00                   |

SE: Standard error of the mean. Note: values from the same row and subtable that do not share the same subscript are significantly different in the multiple comparison test Tukey,  $p < 0.05$ .

**Table S3.** Comparison of internal structure parameters of *S. boulardii* encapsulates.

|                                      |      | Types of Beads          |                       |                         |                       |                       |                         |
|--------------------------------------|------|-------------------------|-----------------------|-------------------------|-----------------------|-----------------------|-------------------------|
|                                      |      | B                       | AB                    | WB                      | AWB5                  | AWB6                  | AWB8                    |
| <b>Second angular momentum</b>       | Mean | 0.0003 <sub>b</sub>     | 0.0002 <sub>b</sub>   | 0.0003 <sub>b</sub>     | 0.0008 <sub>a</sub>   | 0.0007 <sub>a</sub>   | 0.0004 <sub>b</sub>     |
|                                      | SE   | ±0.000                  | ±0.000                | ±0.000                  | ±0.001                | ±0.000                | ±0.000                  |
| <b>Contrast</b>                      | Mean | 420.942 <sub>a</sub>    | 426.818 <sub>a</sub>  | 315.955 <sub>a</sub>    | 332.509 <sub>a</sub>  | 169.706 <sub>b</sub>  | 324.542 <sub>a</sub>    |
|                                      | SE   | ±29.102                 | ±31.257               | ±29.355                 | ±38.740               | ±11.348               | ±24.209                 |
| <b>Correlation</b>                   | Mean | 0.000970 <sub>c,e</sub> | 0.000862 <sub>c</sub> | 0.001055 <sub>c,d</sub> | 0.001713 <sub>a</sub> | 0.002480 <sub>b</sub> | 0.001259 <sub>a,c</sub> |
|                                      | SE   | ±0.000                  | ±0.000                | ±0.000                  | ±0.000                | ±0.000                | ±0.000                  |
| <b>Inverse differential momentum</b> | Mean | 0.097 <sub>b</sub>      | 0.080 <sub>b</sub>    | 0.096 <sub>b</sub>      | 0.148 <sub>a</sub>    | 0.143 <sub>a</sub>    | 0.094 <sub>b</sub>      |
|                                      | SE   | ±0.005                  | ±0.003                | ±0.005                  | ±0.011                | ±0.004                | ±0.003                  |
| <b>Entropy</b>                       | Mean | 8.407 <sub>b,c</sub>    | 8.590 <sub>c</sub>    | 8.410 <sub>b,c</sub>    | 7.588 <sub>a</sub>    | 7.534 <sub>a</sub>    | 8.212 <sub>b</sub>      |
|                                      | SE   | ±0.088                  | ±0.050                | ±0.074                  | ±0.117                | ±0.060                | ±0.064                  |
| <b>SDBC</b>                          | Mean | 2.345 <sub>a</sub>      | 2.411 <sub>b</sub>    | 2.357 <sub>a</sub>      | 2.359 <sub>a</sub>    | 2.348 <sub>a</sub>    | 2.398 <sub>b</sub>      |
|                                      | SE   | ±0.005                  | ±0.006                | ±0.006                  | ±0.009                | ±0.005                | ±0.005                  |

SE: Standard error of the mean. Note: values from the same row and subtable that do not share the same subscript are significantly different in the multiple comparison test Tukey,  $p < 0.05$ .
